# Supplementary material for: Room-temperature tilted-target sputtering deposition of highly transparent and low sheet resistance Al doped ZnO electrodes
Source: Royal Society of Chemistry journal article supplement (doi:10.1039/c5tc00695c), 2015-01-01
Supplement: c5tc00695c1.pdf [file c5tc00695c1.pdf]

## Supporting Information

### Room-temperature tilted-target sputtering of highly transparent and low sheet resistance Al doped ZnO electrodes

*Ravi Chandra Raju Nagiri, Soniya D Yambem, Qianqian Lin, Paul L. Burn\* and Paul Meredith\**

Dr. R.C.R. Nagiri, Dr. S.D. Yambem, Mr. Q. Lin, Prof. P.L. Burn, Prof. P. Meredith  
Centre for Organic Photonics and Electronics  
The University of Queensland, Chemistry Building  
Queensland 4072, Australia

E-mail: [p.burn2@uq.edu.au](mailto:p.burn2@uq.edu.au), [meredith@physics.uq.edu.au](mailto:meredith@physics.uq.edu.au)

#### S.1 Electrode structural (XRD) and morphological (AFM, SEM) characterization

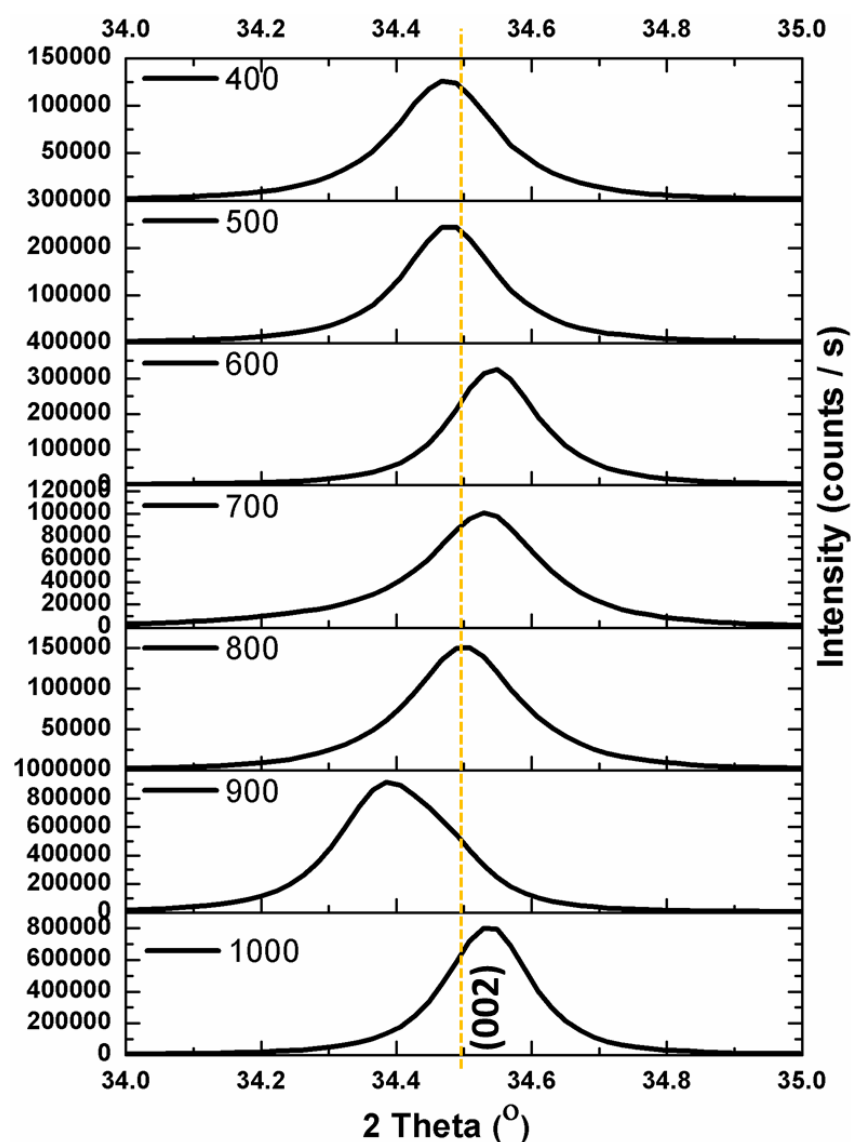

**Figure S1.** XRD patterns of AZO films of different thicknesses ranging from 400 nm to 1000 nm prepared on glass substrates. The (002) diffraction line is noted at 34.5°, which is reported for bulk ZnO powder.

**Table S1:** structural properties and calculated parameters as a function of AZO film thickness from the XRD characterization study.

| Sample details | 2 $\theta$<br>(°) | d<br>(Å) | FWHM<br>(°) | Area of<br>(002)<br>XRD<br>peak | C<br>(Å) | Average<br>crystallite<br>size<br>(Å) | $\sigma$<br>[GPa] |
|----------------|-------------------|----------|-------------|---------------------------------|----------|---------------------------------------|-------------------|
| <b>400 nm</b>  | 34.473            | 2.599    | 0.169       | 34428                           | 5.199    | 492                                   | +0.31             |
| <b>500 nm</b>  | 34.479            | 2.599    | 0.152       | 60672                           | 5.198    | 545                                   | +0.36             |
| <b>600 nm</b>  | 34.545            | 2.594    | 0.141       | 74393                           | 5.189    | 590                                   | +0.76             |
| <b>700 nm</b>  | 34.527            | 2.596    | 0.194       | 30946                           | 5.192    | 429                                   | +0.62             |
| <b>800 nm</b>  | 34.500            | 2.597    | 0.176       | 42960                           | 5.195    | 473                                   | +0.50             |
| <b>900 nm</b>  | 34.535(1)*        | 2.605    | 0.173       | 246178                          | 5.209    | 481                                   | +0.18             |
|                | 34.374(2)*        | 2.607    | 0.137       | -                               | 5.214    | 604                                   | -0.36             |
|                | 34.461(2)*        | 2.600    | 0.120       | -                               | 5.200    | 692                                   | +0.27             |
| <b>1000 nm</b> | 34.535            | 2.595    | 0.135       | 178413                          | 5.190    | 614                                   | +0.71             |

Where (1)\* and (2)\* indicate consideration of the (002) XRD diffraction line as a single Gaussian and deconvolution of two Gaussians, respectively for the stress/strain calculation for the 900 nm thick AZO film.

#### Equations used to calculate the structural parameters from the XRD:

Hexagonal wurtzite structure lattice constant relation:

$$\frac{1}{d^2} = \frac{4}{3} \left( \frac{h^2 + hk + k^2}{a^2} \right) + \frac{l^2}{c^2}$$

For the (002) plane of diffraction, lattice constant  $C = 2 \times d$  (in angstrom units)

Average crystallite size calculated using the Scherrer formulae

$$\text{Average crystallite size} = \frac{0.9\lambda}{\beta \cos \theta}$$

Where  $\lambda$  is the Cu target  $K_{\alpha 2}$  X-ray line wavelength 1.540562 Å,  $\beta$  is full width at half maximum (FWHM) of the XRD diffraction peak in radian units and  $\theta$  is diffraction plane angle for the FWHM.

Stress in the film was calculated by the equation,  $\sigma = -233 \left( \frac{c - c_0}{c_0} \right)$  G Pascal

where,  $C$  is the lattice constant of the film under study and  $C_0$  is the lattice constant of the bulk ZnO powder (5.206 Å). The direction of the stress is in the film parallel to the surface of substrate. Positive (negative) sign of the stress value indicate tensile (compressive) stress in the film plane developed because of the strain induced in the direction of C-axis (normal to the plane of the film surface) for the oriented (002) films.

## S.2 Optical constants for the OPV device stack layers used in this study (as measured from the spectroscopic ellipsometry).

**Table S2.** Thickness and surface roughness of the AZO films prepared at various target tilt angles extracted from the spectroscopic ellipsometry psi/delta data fittings.

| Ellipsometry |        |                |
|--------------|--------|----------------|
| Target tilt  | t [nm] | Roughness [nm] |
| 16.2°        | 353    | 2.6            |
| 20.8°        | 362    | 3.7            |
| 23.8°        | 321    | 2.8            |
| 31.3°        | 322    | 6.5            |
| 38.8°        | 290    | 5.9            |

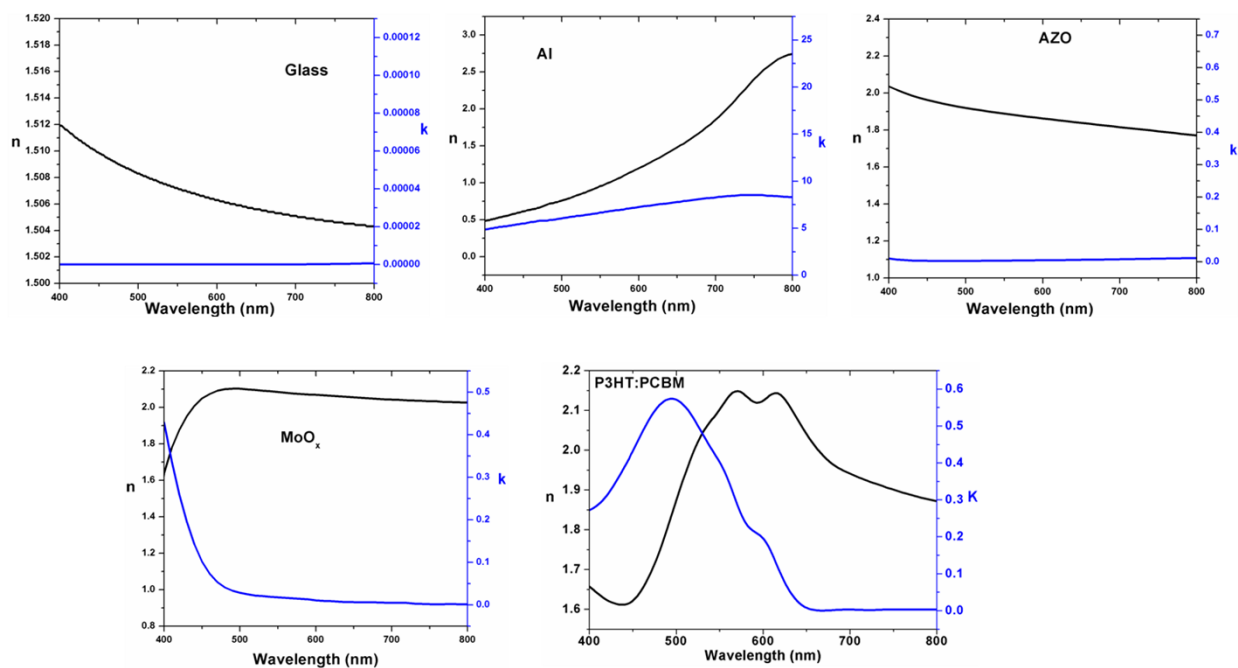

**Figure S2.** Optical constants refractive index ( $n$ ) and extinction co-efficient ( $k$ ) of the stack layers used for the OPV device optical modelling.
